# Supplementary material for: Identification of Novel Pyroptosis-Related Gene Signatures to Predict Prostate Cancer Recurrence
Source: Front Oncol. 2022 May 20;12:814912. doi: 10.3389/fonc.2022.814912 (PMC9163412; doi:10.3389/fonc.2022.814912)
Supplement: Supplementary file 1 [file Table_1.xlsx]

## Sheet: TABLE S1
gene	lowMean	highMean	logFC	pValue	fdr
ABCA10	2.46832	0.426424	-2.0419	0.00251715	0.023186
ACE	1.48982	2.83993	1.3501	0.00817177	0.046353
ACER1	1.58091	0.422125	-1.15879	0.00555249	0.0371444
ACOT8	1.38551	3.1151	1.72959	0.00202301	0.0204858
ACPP	765.39	103.822	-661.567	0.00483014	0.0341666
ACTN1	4.35747	5.66727	1.3098	0.00402497	0.0308164
ADAM33	2.61463	1.40688	-1.20775	0.00852573	0.0474819
ADAMTSL3	44.0107	9.60842	-34.4023	0.00429953	0.0321798
ADPRH	1.87236	3.20564	1.33327	0.000503845	0.00948776
AGAP4	1.97528	0.790473	-1.1848	0.000355157	0.00803817
AGTRAP	2.56959	3.74593	1.17634	0.00461644	0.0332354
AIM1	8.07538	5.78184	-2.29354	0.00577571	0.0380982
ALKBH7	1.88284	2.93848	1.05564	9.35615e-05	0.00390034
ALX3	2.86627	0.27126	-2.59501	0.00584581	0.0383597
AmbionSpike4_EC15_REVCOMP	3.44134	0.632	-2.80934	0.00135327	0.016394
AMPD3	1.65573	3.4921	1.83637	0.000106227	0.00421155
AP1M2	2.62147	4.49731	1.87584	1.39037e-05	0.00150146
APH1B	2.35316	3.35451	1.00135	0.00780706	0.0451647
APOBEC3H	1.51693	0.147273	-1.36966	0.00344207	0.0282823
AQP1	12.425	36.9524	24.5274	0.00333259	0.0275591
ARF6	0.934385	2.18069	1.24631	8.23092e-05	0.00363153
ARHGAP35	1.03837	2.13805	1.09968	0.00069553	0.0111393
ARSA	2.47311	3.85909	1.38599	0.00106736	0.014291
ASB5	27.438	1.37803	-26.06	0.000344537	0.00795663
ATP11A	0.730491	1.93405	1.20356	0.00461644	0.0332354
ATP6V1C2	1.42328	0.204207	-1.21907	0.00200408	0.0203988
ATPAF1-AS1	1.1435	0.0365263	-1.10698	2.57985e-05	0.00205025
ATXN1L	0.311052	2.52379	2.21274	9.47707e-05	0.00393628
AUH	2.88816	1.57944	-1.30871	0.00112382	0.0147148
AZI1	1.64588	2.91981	1.27393	0.00106736	0.014291
BCAM	5.88418	10.6067	4.72253	0.000235752	0.0063952
BCL3	2.7417	4.83635	2.09465	0.00101194	0.013907
BCR/TCR_IGHV1/OR15-6	0.691617	2.66718	1.97557	0.00152923	0.0175093
BCR/TCR_IGHV3/OR16-15	3.69591	9.76528	6.06937	0.000115766	0.00443469
BCR/TCR_IGHV3-33	9.58639	18.3564	8.76999	0.00852573	0.0474819
BEX2	2.32184	0.772503	-1.54934	0.00852573	0.0474819
BZRAP1	2.32278	5.02211	2.69933	0.00916324	0.0493629
C10orf26	1.74623	2.75443	1.0082	0.0010166	0.013907
C11orf71	1.13843	2.49317	1.35474	0.00393602	0.030527
C11orf96	19.2259	8.53266	-10.6932	0.00304097	0.026013
C14orf91	2.26651	0.284399	-1.98211	0.00520407	0.0359811
C16orf58	1.75065	3.02048	1.26983	0.00630742	0.0399329
C1orf132	3.44078	2.13818	-1.3026	0.00635119	0.0400352
C22orf42	6.31988	3.78215	-2.53773	0.00429381	0.0321653
C2orf40	16.7642	12.2172	-4.54697	0.00601837	0.0389325
C4B	1.94766	3.22953	1.28187	0.00152909	0.0175093
C4orf6	1.7365	0.259382	-1.47712	0.00236212	0.0223763
C5orf38	1.63764	2.83377	1.19614	0.000454476	0.00915329
C9orf130	1.29863	0.162186	-1.13644	0.00353941	0.0287694
C9orf72	2.2115	3.30233	1.09083	0.00889311	0.0483872
CA11	1.75583	3.26515	1.50933	0.0073419	0.0434952
CA13	1.33418	0.0842345	-1.24994	0.00788234	0.0454156
CAB39L	11.6609	21.7248	10.0639	0.00272239	0.0244606
CACNA1D	3.99545	77.4684	73.473	0.00688205	0.0419198
CAMSAP3	2.15731	3.30879	1.15148	0.00145441	0.0169123
CASQ2	4.3546	1.19196	-3.16264	0.00629911	0.0399329
CCDC115	2.49407	1.03848	-1.45559	0.00675975	0.0415031
CCDC141	2.56888	0.658582	-1.9103	0.0020432	0.0206304
CCDC17	1.54967	0.170055	-1.37961	0.00359849	0.0291452
CCL2	3.45562	2.38499	-1.07063	0.00503645	0.0352781
CD151	1.77471	2.78436	1.00965	0.000573091	0.0101408
CD19	1.43478	0.35063	-1.08415	0.00399386	0.0308164
CD82	1.30676	2.61411	1.30735	5.78564e-05	0.00310917
CDS1	3.2069	7.70048	4.49359	0.000210541	0.00604768
CDYL2	2.54407	34.7934	32.2493	8.1857e-05	0.00363153
CEP72	8.23451	0.0394943	-8.19502	0.00126482	0.0156569
CHDH	1.48362	3.05917	1.57555	0.00126421	0.0156569
CHN2	1.57055	3.36965	1.7991	0.000359963	0.00811455
CHODL	3.69144	1.15325	-2.53819	0.00877216	0.0483872
CHRM3	1.74372	3.63768	1.89396	0.00334189	0.0275591
CLEC4A	1.78659	0.628649	-1.15794	0.00698701	0.0423894
CLN3	1.48055	2.76816	1.28761	0.00153027	0.0175093
CLVS2	3.22515	1.17362	-2.05153	7.1842e-05	0.00344469
CMA1	1.8065	0.0779994	-1.7285	0.000164709	0.00536613
CMTM4	2.10878	4.04592	1.93714	3.02881e-05	0.00220152
COL4A5	3.19465	1.67017	-1.52448	0.000283905	0.00707517
COL9A2	4.53324	21.5117	16.9784	0.000467093	0.00924553
COLEC11	3.59154	0.227053	-3.36448	0.00556926	0.0372346
CORO1B	2.90451	4.25049	1.34597	0.000959884	0.0136052
CRAT	3.18999	5.0432	1.85321	5.20688e-05	0.00292281
CRB3	3.91013	7.24805	3.33793	0.00139112	0.0164483
CREB3L1	8.33084	12.6262	4.29533	0.00525599	0.0360946
CROT	2.84638	1.68466	-1.16171	0.00405901	0.0310068
CSNK1A1P1	1.37637	0.258647	-1.11772	0.00777843	0.0451647
CSRNP3	4.5163	0.680261	-3.83604	0.00173802	0.0189313
CTGF	4.02135	2.41627	-1.60507	0.00864122	0.0478899
CTNND1	2.39878	3.92778	1.52899	0.00177983	0.0190751
CXorf36	2.17551	0.299845	-1.87567	0.000463417	0.00924553
CYFIP1	2.61426	7.83712	5.22285	0.00118389	0.0151684
CYP2C8	1.32943	0.20309	-1.12634	0.000468321	0.00924553
CYP3A5P2	2.13079	1.10582	-1.02498	0.00658481	0.0408725
DAAM1	3.01128	1.84585	-1.16542	0.00442807	0.0325439
DACH2	4.28954	0.348946	-3.94059	0.000916038	0.0132694
DCAF7	0.807838	2.49061	1.68277	0.00661971	0.0408726
DCK	1.47061	0.256833	-1.21378	0.00411268	0.0313821
DDIT4L	3.58747	0.272213	-3.31526	0.00128661	0.015892
DENND1A	0.986282	1.99796	1.01167	0.00310549	0.0264562
DGCR2	1.98993	3.02069	1.03076	5.20688e-05	0.00292281
DHRS3	2.5692	4.2839	1.7147	0.00384853	0.0300334
DIO1	1.20003	0.159499	-1.04053	0.00377801	0.0299992
DKFZp434L192	1.4511	3.091	1.6399	0.000464597	0.00924553
DLX5	1.7962	0.323279	-1.47292	0.0088889	0.0483872
DNAJC4	2.85691	4.8284	1.9715	0.000136068	0.00482014
DNAL1	1.49772	2.66647	1.16874	0.000248246	0.00662774
DUSP26	3.79636	0.839485	-2.95687	0.00914692	0.0493629
DYNC1I2	2.53608	9.51254	6.97646	3.71993e-05	0.00242415
ECE1	1.54833	2.83641	1.28808	6.7765e-05	0.00331201
EEF2	1.28885	2.49342	1.20457	1.86614e-06	0.000587781
EFCAB7	1.5197	0.420539	-1.09916	0.000989566	0.0138898
EGR1	4.53429	2.63122	-1.90307	0.00750248	0.0439642
ELF3	2.85289	4.15435	1.30146	0.00402497	0.0308164
EPHX1	1.58807	3.09589	1.50782	0.000169799	0.00542352
ERVK-6	2.53278	5.13164	2.59886	0.00764915	0.0447081
EST_AA457302	1.00372	4.19578	3.19206	0.00562511	0.0374095
EST_AA496957	4.76376	2.41469	-2.34907	0.0034821	0.0285176
EST_AI380642	1.34795	0.337797	-1.01015	0.000418097	0.00866105
EVPL	1.87987	5.90375	4.02388	0.000114631	0.00442282
FAM109A	1.06494	2.2414	1.17646	0.00114271	0.0149448
FAM111A	2.74825	1.61986	-1.12839	0.00188918	0.019798
FAM117B	1.501	2.52901	1.02802	0.00211571	0.0210038
FAM162B	3.69583	1.81825	-1.87758	0.00898147	0.0487399
FAM183B	3.54842	5.97729	2.42887	0.00881	0.0483872
FAM84A	8.24837	17.8659	9.61751	0.00483014	0.0341666
FASTK	1.00451	2.39922	1.39472	4.55581e-05	0.00273325
FBXO27	1.26753	0.253007	-1.01452	0.00508473	0.0354401
FBXW4	2.42891	3.66207	1.23315	0.00169283	0.0185998
FGG	2.12041	0.0172626	-2.10315	0.00209127	0.0208191
FLJ30092	3.18555	2.11008	-1.07547	0.00933609	0.0497238
FLJ31813	1.81478	3.12959	1.31481	0.000667106	0.0109327
FLOT2	1.63322	2.65126	1.01804	0.00138198	0.0164483
FLT1	2.52586	4.97946	2.4536	0.00384342	0.0300142
FXYD7	2.01151	4.19142	2.17991	0.000420973	0.00866105
GABRB3	1.26428	2.56496	1.30068	0.000472102	0.00924553
GATA2	2.78912	4.14333	1.3542	0.000558254	0.00991697
GBP5	3.33562	0.648049	-2.68757	0.00840177	0.0473568
GCNT1	7.07922	13.4314	6.35215	0.00690177	0.0419198
GHR	2.57718	0.472205	-2.10497	0.000141864	0.00494953
GJB1	4.13465	9.57495	5.44031	9.55065e-07	0.000541474
GLUD2	1.62634	2.88977	1.26343	4.16073e-06	0.000873676
GNB2	1.89201	2.94289	1.05088	0.000573267	0.0101408
GOLM1	20.2191	66.446	46.2269	0.00187085	0.0197153
GPM6A	2.04091	0.650289	-1.39062	0.00663461	0.0409302
GPR27	1.74982	4.36403	2.61421	0.000234553	0.0063952
GPR64	3.0477	1.02653	-2.02118	0.00803376	0.0461006
GRHL2	9.1136	15.708	6.5944	0.00917915	0.0493629
GRIK1	2.75081	0.819954	-1.93086	0.00885223	0.0483872
GRIN2D	1.82667	7.27281	5.44615	0.000540195	0.00991565
GRINA	1.57232	2.6194	1.04707	0.000169707	0.00542352
GSN	2.76313	4.14295	1.37982	0.000281472	0.0070455
GSTT2	4.91697	1.66022	-3.25675	2.1975e-06	0.000638909
GSX1	1.91098	3.55948	1.64851	0.00452315	0.033057
GYLTL1B	3.87147	6.58323	2.71176	0.000658586	0.01087
H2AFY2	0.965757	2.16506	1.19931	9.55692e-06	0.00125504
HDLBP	0.844196	2.40184	1.55764	0.000755222	0.0117445
HES3	2.0233	3.43572	1.41242	0.00325949	0.0272763
HIPK2	2.31569	3.97875	1.66306	0.00206563	0.0206545
HMG20B	1.93019	3.16658	1.23639	0.000499361	0.00948776
HMGCL	1.28195	2.2989	1.01695	4.25949e-05	0.00263925
HMGN2P46	1.2101	2.30131	1.09121	0.000316346	0.00750429
HMGXB3	1.69876	2.8965	1.19774	3.4747e-05	0.00238786
HOXC5	1.42531	0.19152	-1.23379	0.000412153	0.00866105
HSPA1B	1.94097	3.32989	1.38892	0.000165163	0.00536613
IDI2-AS1	1.5364	0.150543	-1.38586	0.000121453	0.00451525
IGSF22	2.33426	0.223398	-2.11087	0.000499843	0.00948776
IGSF5	3.49092	1.56172	-1.9292	0.0039023	0.0302862
IKZF2	0.960319	3.23673	2.27641	4.98784e-05	0.00290036
IL17RD	0.569023	1.62427	1.05525	0.000311365	0.00744845
IL1RAPL1	2.98883	1.39515	-1.59368	0.00228987	0.0217825
IL34	1.99598	0.231518	-1.76446	0.0013696	0.0164483
INHBB	3.99785	13.7584	9.76056	0.00647978	0.0406517
INTS4L1	4.55585	0.0507782	-4.50508	0.00123739	0.0156049
ISOC2	1.06776	2.69682	1.62906	3.32411e-07	0.00049133
JMJD1C	2.70342	1.16284	-1.54058	0.000558254	0.00991697
JMJD4	2.42188	0.369355	-2.05253	0.0051916	0.0359387
JUP	1.63947	2.9178	1.27833	4.86234e-06	0.000934476
KBTBD10	3.18942	0.405733	-2.78368	0.00107021	0.0143102
KCNB1	1.35349	0.213549	-1.13994	0.000878489	0.0129534
KCNE3	5.90302	1.01175	-4.89127	0.00133382	0.0161929
KCNN4	3.28238	10.4094	7.12698	5.56395e-05	0.00304781
KIAA0894	2.91955	0.683339	-2.23621	0.00141817	0.0167398
KIAA1683	2.78592	0.744559	-2.04136	0.00101133	0.013907
KIF13B	2.93167	4.12758	1.19591	0.000590026	0.0102298
KLC2	1.13365	2.20694	1.07329	8.23092e-05	0.00363153
KLF3	2.70813	5.55076	2.84263	2.02621e-05	0.00182343
KLHL22	1.43813	2.51801	1.07988	0.00172077	0.0188156
KRT18P41	0.678828	1.91788	1.23905	3.55507e-06	0.000806218
KRTCAP3	2.47446	3.84839	1.37393	0.00120484	0.0153502
LAMC2	3.12304	8.28084	5.1578	0.000467093	0.00924553
LCE5A	1.78949	3.85044	2.06095	0.0044112	0.0325218
LFNG	2.83169	7.02033	4.18864	0.00103894	0.0141612
LIMS2	6.77956	8.44148	1.66192	0.00917915	0.0493629
LIPH	16.1568	5.02112	-11.1357	0.0022143	0.0214855
LOC114135	2.00854	0.677626	-1.33091	1.86614e-06	0.000587781
LOC131973	1.56921	3.48344	1.91423	0.000169707	0.00542352
LOC147294	1.4357	0.101134	-1.33456	0.00288139	0.0253126
LOC151174	1.34753	2.86407	1.51654	0.00532289	0.0363155
LOC157381	11.2368	4.68621	-6.5506	0.00713276	0.0427663
LOC159176	2.7564	3.86311	1.10671	0.00927433	0.0494413
LOC199899	1.0382	0.0306452	-1.00756	2.30228e-05	0.00195247
LOC283143	1.3461	0.327367	-1.01873	0.00651174	0.0407937
LOC284240	3.02944	0.805412	-2.22403	0.000118861	0.00449329
LOC284336	2.42968	1.03371	-1.39596	0.000885015	0.0130327
LOC284578	2.95634	1.21076	-1.74558	0.00387209	0.0301617
LOC285929	10.3429	1.67238	-8.67056	0.000639694	0.0107778
LOC286161	2.17526	5.12371	2.94845	8.66761e-05	0.00372735
LOC286191	6.37993	0.41556	-5.96437	0.000180193	0.0056236
LOC339316	16.835	1.18116	-15.6538	0.00420939	0.0317713
LOC339666	0.71676	2.79816	2.0814	0.00242479	0.0227416
LOC345375	1.79577	3.28082	1.48505	0.00187085	0.0197153
LOC345537	0.980783	2.23684	1.25606	0.00041011	0.00864357
LOC388177	1.24252	0.2066	-1.03592	0.00601921	0.0389325
LOC388681	1.24141	0.234041	-1.00737	0.00791654	0.0455447
LOC388760	0.488386	1.85781	1.36942	0.000232745	0.0063952
LOC388763	3.87806	8.66332	4.78526	7.70011e-05	0.00353182
LOC389642	1.35984	0.336948	-1.02289	0.0049463	0.0349011
LOC389695	3.14899	5.85173	2.70274	0.00159202	0.0179826
LOC389822	1.23639	2.73298	1.49659	0.000194353	0.00578608
LOC390613	1.92141	4.04529	2.12388	7.71669e-05	0.00353182
LOC391562	1.1558	2.47575	1.31995	3.26614e-05	0.00234398
LOC391705	1.71339	5.22458	3.51119	0.000485338	0.00942336
LOC392352	1.51226	0.109585	-1.40267	0.00155849	0.0177955
LOC392563	2.23912	0.143918	-2.0952	0.00918561	0.0493629
LOC399921	2.02113	0.445539	-1.5756	0.00496115	0.0349841
LOC400161	2.35725	1.29147	-1.06577	0.00217401	0.0211598
LOC400832	2.67827	4.86013	2.18187	0.00197894	0.020161
LOC400944	8.06774	2.73205	-5.33569	0.00271239	0.02439
LOC402436	24.8988	0.199623	-24.6991	0.000162475	0.00536404
LOC402508	2.06178	3.3542	1.29242	0.00196606	0.0201202
LOC402634	1.14233	2.15187	1.00955	6.34741e-05	0.00327151
LOC439961	1.52274	2.78576	1.26302	2.82644e-05	0.00212807
LOC440033	3.23971	1.15528	-2.08443	0.00108443	0.0144834
LOC440197	1.40608	3.78469	2.37861	4.17734e-05	0.00263149
LOC440301	1.59994	0.0770889	-1.52285	0.00150382	0.0173644
LOC440368	2.42966	5.34642	2.91676	1.43946e-05	0.00153981
LOC440401	1.44702	0.360342	-1.08667	0.00485169	0.0342976
LOC440711	4.12605	1.51321	-2.61284	0.00435906	0.0324967
LOC440858	1.49528	0.14949	-1.34579	0.000321546	0.0076117
LOC440923	2.17727	5.44297	3.2657	0.00387295	0.0301617
LOC441610	0.775853	2.47578	1.69993	0.00302081	0.026013
LOC441776	4.93979	0.222039	-4.71775	0.00285575	0.0252191
LOC442069	1.55932	3.49015	1.93082	7.72459e-05	0.00353182
LOC442081	2.90826	5.83825	2.92999	0.000877435	0.0129534
LOC442534	3.79136	1.79073	-2.00063	0.0077689	0.0451647
LOC83459	0.666684	1.79896	1.13227	1.53785e-06	0.000587781
LOC88523	4.58146	2.47385	-2.10761	0.00201143	0.0204552
LPAR2	2.1656	5.67135	3.50575	0.000898047	0.013194
LPCAT3	2.82709	3.95087	1.12378	0.000211207	0.00604768
LPPR2	1.86871	5.05593	3.18722	3.62827e-07	0.00049133
LRFN1	0.281317	1.45041	1.16909	3.2722e-06	0.000789435
LRFN3	0.9331	2.49725	1.56415	0.000210911	0.00604768
LSR	1.60978	2.94854	1.33877	6.61137e-06	0.0010412
MAGED2	2.21444	4.26243	2.048	2.459e-05	0.00199162
MAP3K8	1.84704	0.558884	-1.28815	0.000989991	0.0138898
MAPK13	1.41738	3.23752	1.82014	0.000235366	0.0063952
MAPK8IP1	1.60982	3.01011	1.40028	0.00560066	0.0372687
MARK2	1.48126	3.41967	1.93841	0.000136455	0.00482014
MAZ	1.12774	2.51879	1.39105	1.96432e-05	0.00181468
MEG3	5.7478	1.00674	-4.74106	0.00635182	0.0400352
MFSD10	1.49059	2.88508	1.39449	5.20688e-05	0.00292281
MFSD3	1.23233	2.27486	1.04253	0.000350809	0.00803817
MIB2	1.07357	2.42184	1.34827	0.000132354	0.00482014
miRNA_miR-9*	1.51928	0.371805	-1.14748	1.94417e-05	0.00181468
MJ-1000-72_435_a_49_2	3.08062	0.798007	-2.28261	0.00156234	0.0177955
MJ-1000-72_435_a_7_2	1.13823	0.0374148	-1.10081	1.51577e-05	0.00157682
MJ-1000-72_435_d_1_1	2.46411	0.439412	-2.02469	0.000126676	0.00467875
MJ-1000-74:559-628	4.48109	0.0885463	-4.39255	0.000959485	0.0136052
MJ-1000-74_823	2.04367	0.0694673	-1.97421	0.000693598	0.0111393
MJ-1000-74_823_a_7_2	3.4305	0.141511	-3.28899	0.000535692	0.00987676
MJ-125-9_23_REVCOMP	2.14761	0.0554297	-2.09218	4.31556e-05	0.00265946
MKNK1	1.48972	0.4773	-1.01242	0.00101675	0.013907
MLEC	1.55538	2.67019	1.11481	2.1975e-06	0.000638909
MMP19	1.79521	0.725827	-1.06938	0.00904227	0.0489639
MMP26	5.70138	3.53782	-2.16356	0.00295888	0.0256897
MPZL3	2.36171	4.12551	1.7638	0.00132005	0.0161294
MUC3B	6.5875	12.4994	5.91191	0.00318825	0.0268785
MXD4	2.19943	5.04848	2.84905	5.61447e-05	0.0030499
MXRA8	3.63048	4.81218	1.18171	0.00461644	0.0332354
MYL7	2.18716	0.196558	-1.9906	0.00767141	0.0448151
MYO18B	1.7909	0.492392	-1.29851	0.00250527	0.023148
NAALADL2	9.10156	17.5644	8.46285	0.00296975	0.0257643
NBEAL2	1.07451	2.25757	1.18306	0.00112382	0.0147148
NBL1	3.22212	1.87991	-1.34222	0.00202528	0.0204858
NCAPD3	7.87768	2.66176	-5.21592	0.00505261	0.0352781
ncRNA_HBII-52_10_0	3.68984	0.778857	-2.91098	0.000464108	0.00924553
ncRNA_HBII-52_11_0	3.92048	0.76495	-3.15553	8.7498e-05	0.00372735
ncRNA_HBII-52_13_0	4.32053	0.76362	-3.55691	2.00048e-05	0.00181468
ncRNA_HBII-52_2_0	4.39036	0.771199	-3.61916	0.00453387	0.0331034
ncRNA_HBII-52_23_0	3.09155	1.51673	-1.57482	0.00399386	0.0308164
ncRNA_HBII-52_24_0	7.26799	1.78802	-5.47998	0.000592819	0.0102626
ncRNA_HBII-52_29_0	3.39398	0.966817	-2.42716	0.00819557	0.0464416
ncRNA_HBII-85_groupI_12_0	2.81683	4.82573	2.00889	0.00177983	0.0190751
ncRNA_HBII-85_groupI_5	2.76568	5.57534	2.80966	0.00202528	0.0204858
ncRNA_HBII-85_groupI_7_21	2.73602	4.30085	1.56483	0.00196606	0.0201202
ncRNA_HBII-85_groupI_9_1	2.54405	4.1859	1.64184	0.00917831	0.0493629
ncRNA_mir-145_18	50.3215	9.68135	-40.6402	0.00528014	0.0360946
ncRNA_mir-221_17	1.44567	0.389756	-1.05591	0.00788682	0.0454183
ncRNA_mir-23a_3	2.43081	0.423048	-2.00776	0.00192188	0.0200947
ncRNA_mir-27a_1	1.40088	0.357416	-1.04346	0.00353941	0.0287694
ncRNA_mir-29c_2	4.95065	3.69289	-1.25775	0.00643111	0.0404674
NECAB3	2.17422	3.22443	1.05021	0.00528415	0.0360946
NELL2	5.1739	1.37435	-3.79954	0.006225	0.0398112
NEO1	3.3741	5.34071	1.9666	0.000108745	0.00425275
NFIB	5.25573	7.53728	2.28155	0.000376162	0.0082183
NICN1	1.79955	0.720279	-1.07927	7.95278e-05	0.00362155
NLGN4Y	2.20243	0.210503	-1.99193	0.000956003	0.0136052
NME4	1.80403	3.08935	1.28532	0.000335235	0.00775762
NR2E3	1.47405	0.237325	-1.23672	0.00135271	0.016394
NRG2	1.73646	0.302525	-1.43393	0.00713493	0.0427663
NUBP2	0.836382	2.05871	1.22233	9.55065e-07	0.000541474
OLFM2	2.66784	4.5693	1.90146	0.00145831	0.0169123
OR13A1	2.56398	0.747548	-1.81643	0.00120137	0.0153405
OR13C4	1.99935	0.470141	-1.52921	0.00585385	0.0383903
OR4E2	2.12861	0.204797	-1.92381	0.00159955	0.0179826
OR4X2	1.6129	3.67573	2.06283	0.00283944	0.0251731
OR56A4	1.88662	4.71983	2.83321	2.08804e-05	0.00183663
OR7A10	1.05547	3.48614	2.43067	0.000916301	0.0132694
OR8B8	1.76249	3.96008	2.19758	0.0003073	0.00737045
OTUD7B	1.16803	2.4302	1.26217	0.000247565	0.00662774
PAFAH2	1.18255	5.28561	4.10307	6.1995e-07	0.000502115
PARP11	2.47045	4.43699	1.96654	0.00153027	0.0175093
PCDHA7	2.52626	0.211517	-2.31474	0.000607188	0.0104159
PCDHGB1	0.945882	2.74265	1.79677	0.00517001	0.035833
PCNXL2	2.18263	3.48918	1.30655	0.00889311	0.0483872
PDE4D	1.49215	2.59207	1.09993	0.00172055	0.0188156
PDK1	3.94056	0.114316	-3.82624	0.00348288	0.0285176
PDZRN4	28.1748	14.1162	-14.0586	0.00914692	0.0493629
PEX10	1.96972	5.3649	3.39518	2.9216e-05	0.00216523
PEX11G	1.97609	4.88583	2.90974	2.58564e-05	0.00205025
PGM5P1	19.8503	30.6146	10.7643	0.0080684	0.046276
PLA1A	6.3686	11.7414	5.37283	0.00087756	0.0129534
PLAC8L1	1.61593	0.177195	-1.43873	1.72579e-05	0.001712
PLEKHB2	0.956262	1.98011	1.02385	3.033e-06	0.000747635
PLVAP	9.58637	34.6353	25.049	0.00608582	0.0391367
PPP1R10	1.83474	4.15706	2.32232	0.000517648	0.00966988
PPP1R13B	5.01799	3.36219	-1.6558	0.00285076	0.0251947
PPP1R1B	27.1567	59.392	32.2353	0.00187085	0.0197153
PPP2R4	1.45266	5.24866	3.796	5.25344e-06	0.000976537
PPP3CA	8.151	10.6904	2.53937	0.00817177	0.046353
PRAC	41.8211	91.806	49.985	0.00792583	0.0455735
PSENEN	1.07469	2.11408	1.03939	1.96342e-05	0.00181468
PSTPIP1	2.52743	4.16852	1.64109	0.000332658	0.00775762
PTMS	1.79365	2.81278	1.01913	0.000185411	0.0056236
PTOV1	1.51456	2.79537	1.28082	9.71111e-05	0.00401877
PTP4A3	2.27644	4.37793	2.10149	0.00251099	0.023148
PYGO1	1.7143	3.50184	1.78754	0.000633549	0.0107031
R3HCC1	1.14216	2.60383	1.46167	0.0044112	0.0325218
rab1c	1.8689	3.16871	1.29982	0.000369701	0.0082183
RAB25	3.19921	4.66422	1.46501	0.000504474	0.00948776
RAB3D	12.604	15.8404	3.23637	0.000590026	0.0102298
RAB40A	1.88262	0.461139	-1.42148	0.00387209	0.0301617
RALGAPA2	4.12721	6.87817	2.75096	0.000499361	0.00948776
RAMP1	35.7693	14.4516	-21.3177	0.00648548	0.0406517
Random_651	1.55603	0.422837	-1.1332	0.00125883	0.0156569
Random_795	1.66837	0.312232	-1.35614	0.00826821	0.0468298
Random_804	2.33502	4.8709	2.53589	0.00316344	0.0268719
RASEF	10.8835	26.5107	15.6271	0.000261608	0.00683937
RBM47	6.95763	11.3476	4.38997	0.000398302	0.0084879
RDH12	1.49935	0.302362	-1.19699	0.00118632	0.0151824
RFFL	1.97912	3.20669	1.22757	0.00101194	0.013907
RNASEH2CP1	2.11947	0.204553	-1.91492	0.00694414	0.0421518
RNF135	1.10037	2.22865	1.12828	0.00117613	0.0151684
RNF19A	1.1582	2.232	1.0738	6.34741e-05	0.00327151
RNPEPL1	2.18716	4.47448	2.28732	0.00111998	0.0147148
RORB	0.711164	2.43915	1.72799	0.00363648	0.0293567
RORC	8.77052	23.3591	14.5886	0.000353187	0.00803817
RPL7AP34	1.11734	2.4986	1.38126	1.35304e-05	0.00150146
RPLP2P1	1.3647	0.04333	-1.32137	0.000803397	0.0122607
RPS6KB2	2.05167	3.77762	1.72595	0.00559894	0.0372687
RSPH3	2.49852	3.64782	1.1493	0.000199755	0.00584286
RSPH9	1.52796	0.101312	-1.42665	5.69842e-05	0.00307687
RTN4	1.05085	2.41752	1.36667	0.000499361	0.00948776
RUNDC3B	3.17524	0.193161	-2.98208	0.000551568	0.00991697
SCARB2	3.76821	5.10508	1.33687	0.000369701	0.0082183
SCML4	1.5758	0.544858	-1.03095	0.00840076	0.0473568
SEC61A1	1.97139	3.19748	1.22609	2.15462e-05	0.00187932
SEMA3C	2.97624	1.81761	-1.15863	0.00289982	0.0253126
SEPN1	3.06091	4.87002	1.80911	0.00749411	0.0439642
SEPW1	2.36523	3.5395	1.17427	0.0020726	0.0206695
SERF2	1.5756	2.62209	1.04649	8.23092e-05	0.00363153
SERINC5	3.22107	5.33314	2.11207	0.000136455	0.00482014
SEZ6L2	1.72443	2.83025	1.10583	3.4747e-05	0.00238786
SFXN2	1.42026	2.54164	1.12138	0.00177983	0.0190751
SGCA	2.60786	5.04262	2.43477	0.00202528	0.0204858
SIGLEC8	2.25966	14.0734	11.8137	0.00860518	0.0478305
SIX1	3.82922	5.29843	1.46922	0.00177983	0.0190751
SLC16A9	3.52248	2.01329	-1.50919	0.00897929	0.0487399
SLC18A2	7.69405	3.37542	-4.31863	0.00192135	0.0200947
SLC1A1	2.79327	0.994928	-1.79834	0.00360382	0.0291675
SLC24A6	1.35132	2.5916	1.24028	0.000590026	0.0102298
SLC26A2	3.51987	5.76491	2.24504	0.000179376	0.0056236
SLC26A3	8.17373	2.86351	-5.31021	0.00602561	0.0389325
SLC26A5	7.60433	2.28724	-5.3171	0.000381285	0.00828235
SLC27A4	0.797	2.53834	1.74134	2.61451e-07	0.00049133
SLC46A1	1.92731	3.77655	1.84925	0.00106655	0.014291
SLC6A1	6.99142	0.217733	-6.77369	0.00588748	0.038544
SMCR8	1.23185	2.25074	1.01889	0.000528056	0.00975183
SMPD2	1.72057	2.79289	1.07232	0.00325578	0.0272763
SNORA65	6.76672	23.2399	16.4732	0.00933609	0.0497238
SNORD115-1	3.66794	2.05098	-1.61696	0.00600445	0.0389325
SNORD33	1.47223	2.99699	1.52476	0.000125164	0.00463802
SNX31	2.92896	0.149057	-2.7799	0.0021316	0.0210725
SNX33	1.39329	2.58443	1.19114	0.00318421	0.0268785
SOD3	4.23485	7.19283	2.95798	0.00188918	0.019798
SORL1	1.82165	3.00103	1.17938	0.000102773	0.00419188
SPATA20	1.4263	3.39028	1.96397	0.000145166	0.004971
SPIN2A	3.06228	0.92131	-2.14097	0.00412529	0.0314359
SRD5A2	74.6199	27.3536	-47.2663	0.00658481	0.0408725
SRL	1.65743	0.20375	-1.45368	0.00129619	0.0159236
SSC5D	1.90249	3.02284	1.12036	0.00503697	0.0352781
ST14	6.23015	13.8193	7.58919	0.000281472	0.0070455
ST8SIA5	1.08317	0.0802117	-1.00296	0.0016017	0.0179826
STAC2	1.71898	3.75278	2.0338	0.00611931	0.0392682
STARD3NL	3.0284	2.00451	-1.02389	0.00783082	0.0451647
STEAP1	14.3422	8.43223	-5.91	0.00414957	0.0315396
STEAP4	30.5925	72.6009	42.0084	0.000281472	0.0070455
STK31	1.30722	0.231001	-1.07622	5.62156e-05	0.0030499
SV2B	3.58841	1.80012	-1.78829	0.00170586	0.0187249
SYBU	4.68244	2.05701	-2.62542	0.00586693	0.0384538
SYNJ2BP	1.51931	2.58229	1.06298	9.97078e-05	0.00408879
SYNPO	4.32577	7.19847	2.8727	0.000306941	0.00737045
SYT13	1.12579	5.14653	4.02074	2.30736e-05	0.00195247
SYTL4	3.29753	2.0368	-1.26073	0.0031802	0.0268785
TACC2	5.5105	3.53443	-1.97607	0.00118389	0.0151684
TAOK3	3.65648	7.20184	3.54536	0.00272529	0.0244672
TBC1D8B	1.92861	3.42889	1.50028	0.00384342	0.0300142
TC2N	8.9624	16.434	7.47163	0.00212095	0.0210038
TEC	1.2937	0.249952	-1.04375	0.00836412	0.0472315
TFF3	7.44044	11.9096	4.46921	0.00126202	0.0156569
TGM2	1.94042	3.1016	1.16118	0.00927433	0.0494413
TGM5	1.23728	0.112512	-1.12477	0.00173126	0.0188809
TLE3	1.9829	3.11344	1.13054	0.00131284	0.0160586
TM7SF2	4.03058	5.46397	1.43339	0.00124685	0.0156049
TMEM11	1.20829	2.33583	1.12754	0.000734359	0.0115012
TMEM129	1.45021	4.15291	2.70271	1.60659e-05	0.00162653
TMEM141	3.22716	4.80832	1.58116	0.000399831	0.0084879
TMEM159	1.25179	2.95523	1.70344	0.000265396	0.00683937
TMEM63A	2.03005	3.13447	1.10441	0.00577571	0.0380982
TMEM63B	1.8386	4.32216	2.48356	0.00054312	0.00991565
TMPRSS11E	1.65286	0.109209	-1.54366	0.00065514	0.01087
TMTC2	3.31395	6.81351	3.49955	0.00217032	0.0211598
TNFSF13	3.24896	8.73105	5.48209	0.00429476	0.0321653
TNNI1	1.59263	0.279115	-1.31351	0.000435296	0.00892554
TPSAB1	21.9336	47.6161	25.6825	0.000658586	0.01087
TRPC6	1.9318	0.459148	-1.47265	0.00371437	0.0295875
TSPAN15	2.31944	5.92365	3.60421	7.07655e-05	0.00344382
TSPAN17	0.948421	2.37382	1.4254	0.00334189	0.0275591
TSPO	1.59859	2.85091	1.25232	1.33937e-06	0.00058412
TULP2	1.77691	4.07186	2.29495	1.53329e-05	0.00158055
UBE3A	0.975896	2.00711	1.03121	8.2935e-06	0.00122108
UTRN	3.09414	4.59157	1.49743	0.000623444	0.0105827
VASP	1.5961	5.45001	3.85391	0.000216706	0.00618949
VGLL3	3.7419	1.72066	-2.02124	0.00728583	0.0432308
VN1R2	6.94566	1.32582	-5.61984	0.000185486	0.0056236
WDR96	5.52459	0.531623	-4.99297	0.00601921	0.0389325
WNK2	2.74491	4.59094	1.84604	0.00415002	0.0315396
WNT11	3.03597	4.50065	1.46468	0.00634993	0.0400352
WTIP	1.20413	2.24325	1.03912	0.00069553	0.0111393
ZDHHC21	2.18171	6.46103	4.27932	1.03707e-05	0.00133628
ZFPL1	0.975841	2.43805	1.46221	8.18087e-05	0.00363153
ZNF493	1.33703	0.209905	-1.12712	0.00325572	0.0272763
ZNF524	2.33908	5.73048	3.3914	0.00665913	0.0410592
ZNF592	1.63316	3.20827	1.57511	0.000863025	0.0127919
ZNF641	1.56708	2.77989	1.21281	0.00412526	0.0314359
ZNF649	1.84256	3.97991	2.13736	0.00421414	0.0317713
